# Supplementary material for: Chemical Vapor Deposition of Highly Conjugated, Transparent Boron Carbon Nitride Thin Films
Source: PubMed Central journal article supplement (PMC8425861; doi:10.1002/advs.202101602), 2021-07-03
Supplement: ADVS-8-2101602-s001.pdf [file ADVS-8-2101602-s001.pdf]

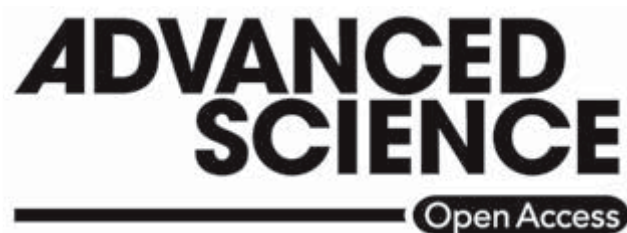

## Supporting Information

for *Adv. Sci.*, DOI: 10.1002/adv.202101602

### **Chemical vapor deposition of highly conjugated, transparent boron carbon nitride thin films**

*Paolo Giusto,\* Daniel Cruz, Tobias Heil, Nadezda Tarakina,  
Maddalena Patrini, and Markus Antonietti\**

## Supporting Information

### Chemical vapor deposition of highly conjugated, transparent boron carbon nitride thin films

*Paolo Giusto, Daniel Cruz, Tobias Heil, Nadezda Tarakina, Maddalena Patrini and Markus Antonietti*

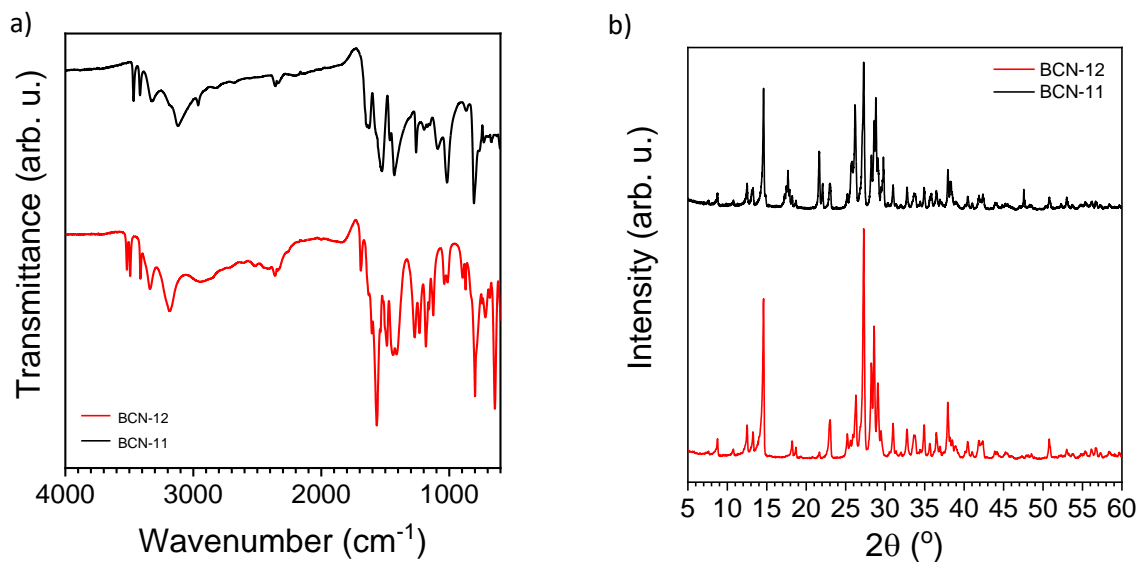

FIG S1. FTIR (a) and XRD (b) of BCN-12 (red line), BCN-11 (black line).

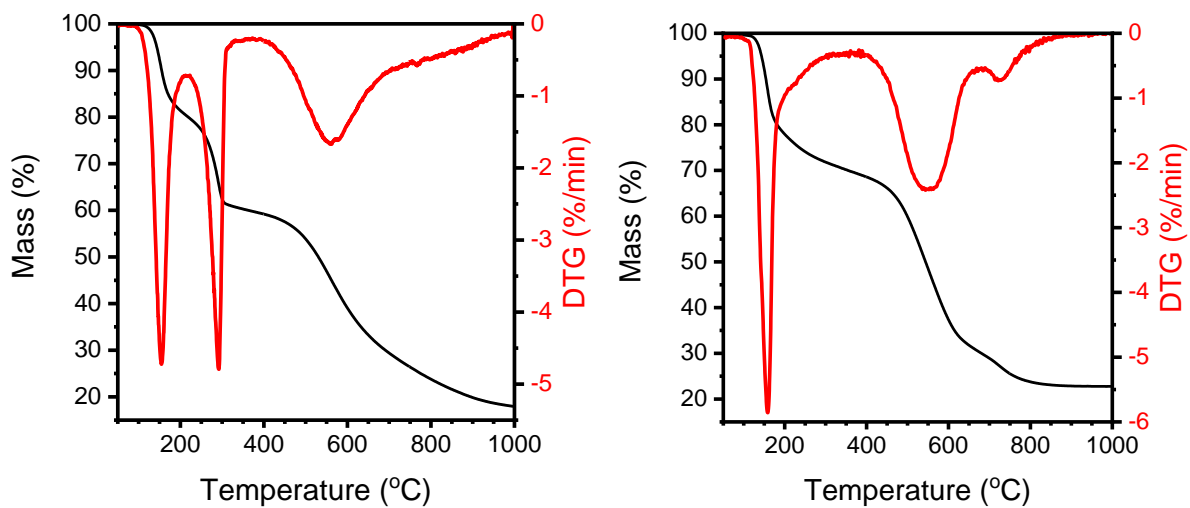

Figure S2. TGA and derivate (DTG) of BCN-11 (left) and BCN-12 (right) precursors.

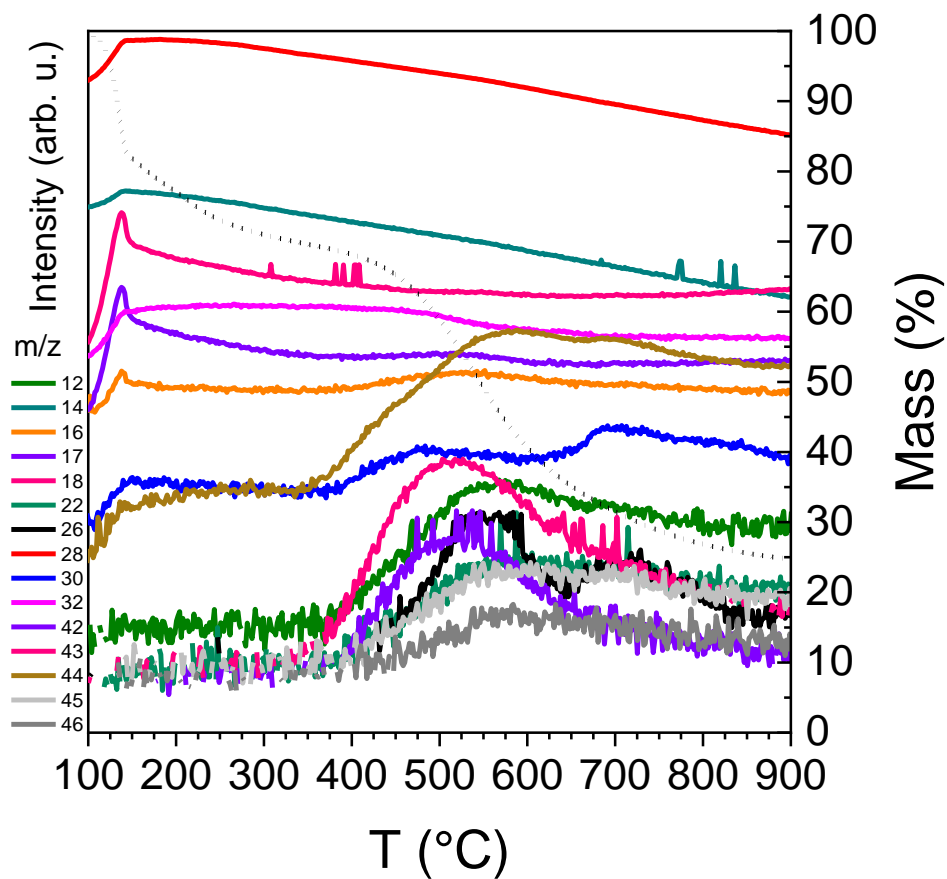

Figure S3. TGA MS of BCN-12 precursor. Dotted line is the TGA, solid lines MS at different  $m/z$ .

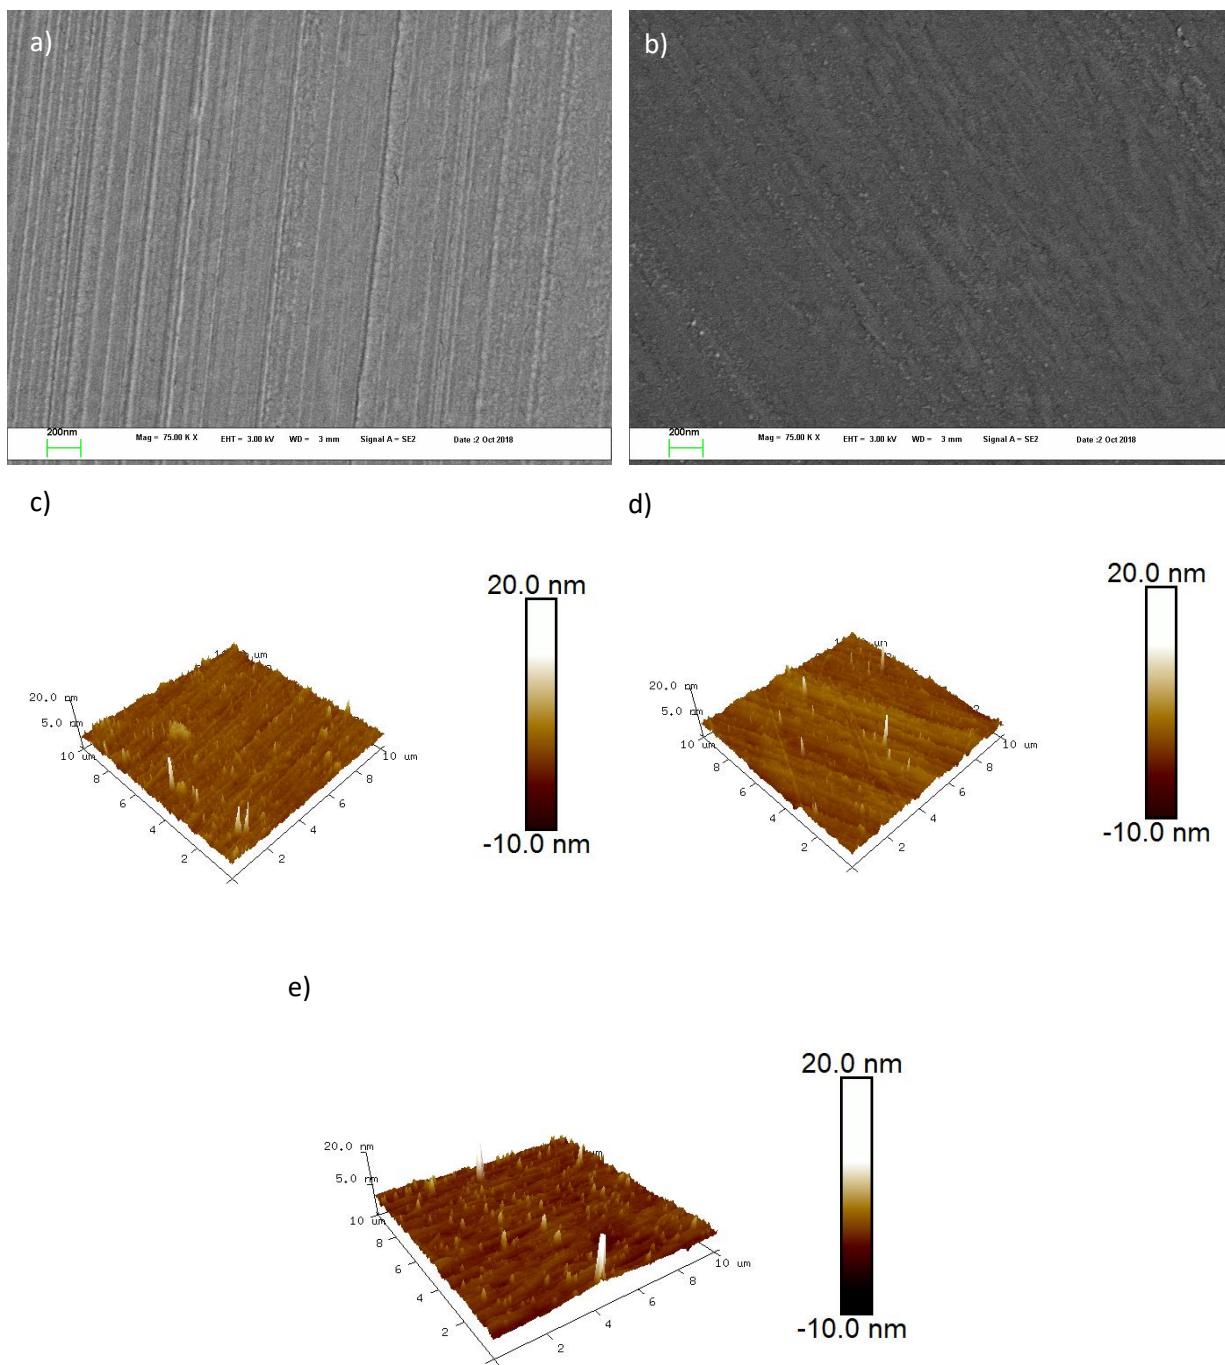

Fig S4. SEM images of BCN-11 (a) and BCN-12 (b). AFM of BCN-11 (c) and BCN-12 (d) on fused silica substrates. (e) AFM of bare fused silica substrate. Roughness ( $R_q$ ): 1.13 nm (BCN-11), 1.05 nm (BCN-12), and 1.01 nm (bare fused silica) over a  $100 \mu\text{m}^2$  surface.

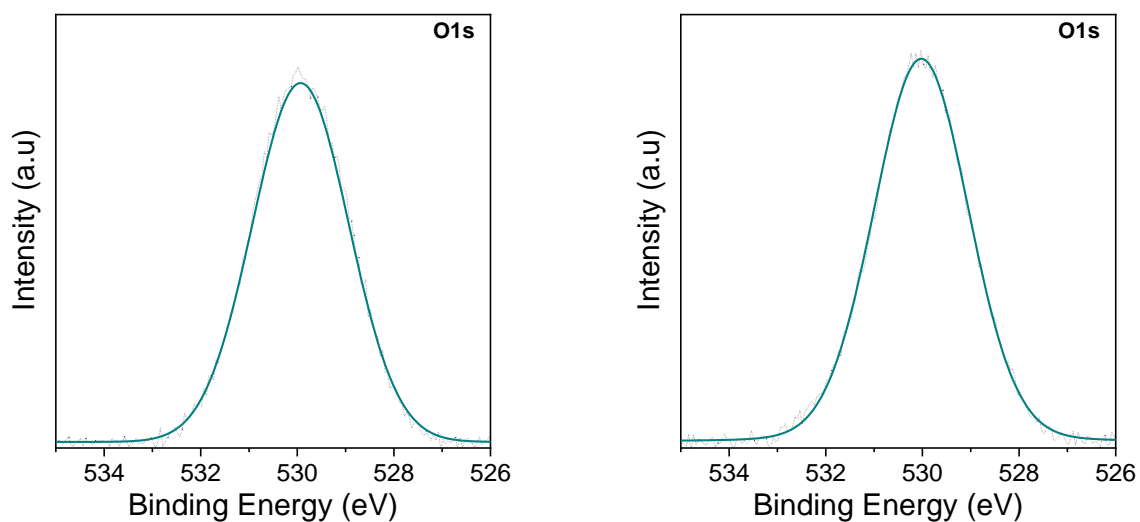

Fig S5. O1s XPS peak deconvoluted of BCN-11 (left) and BCN-12 (right).

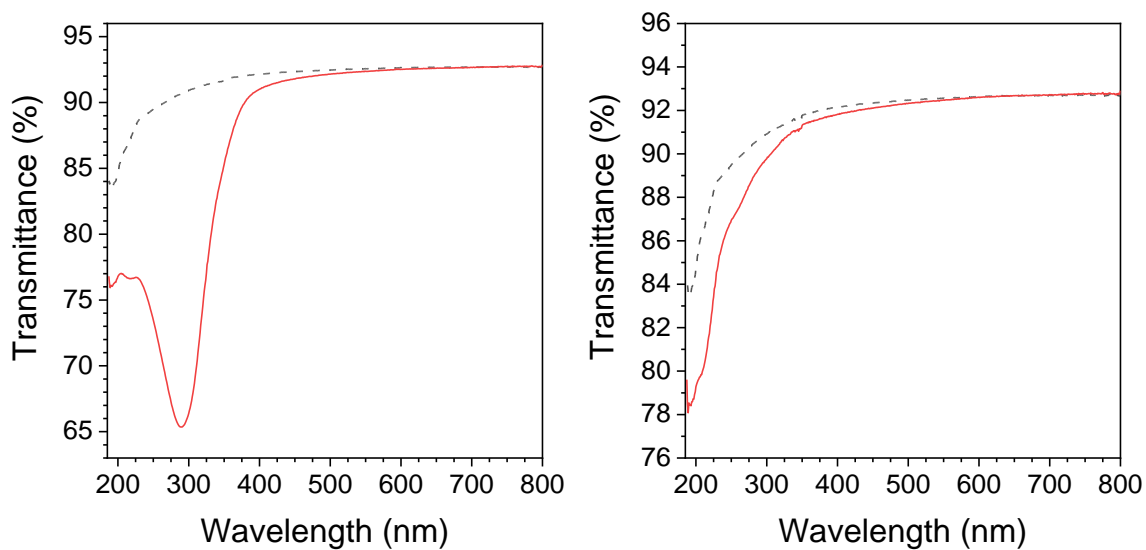

Fig S6. Transmittance of BCN-11 (left) and BCN-12 (right)

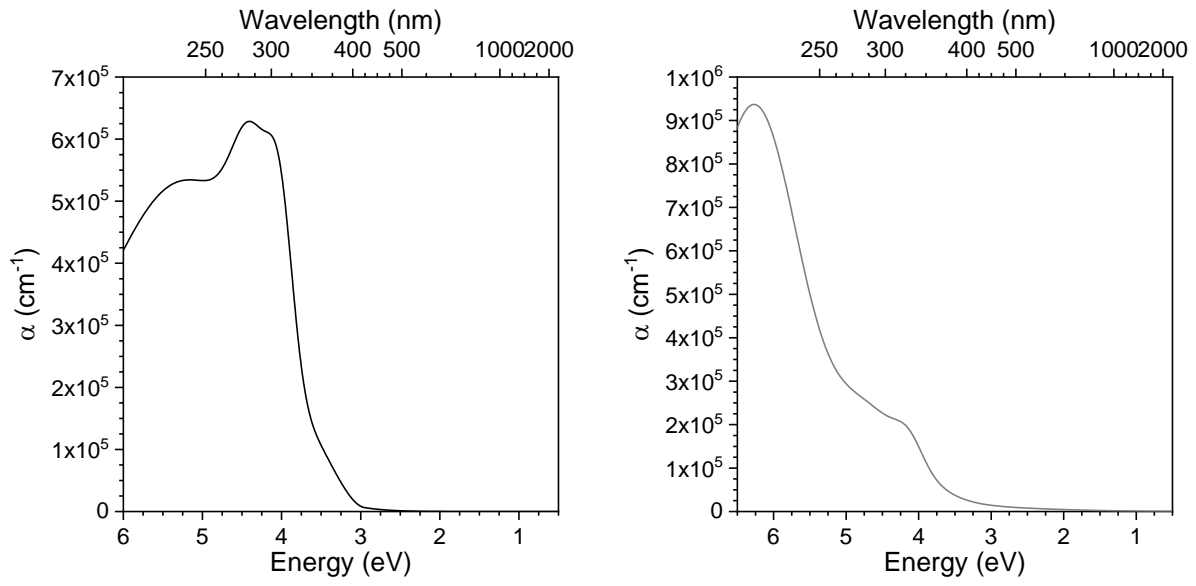

Fig S7. Absorption coefficient spectra of BCN-11 (left) and BCN-12 (right)

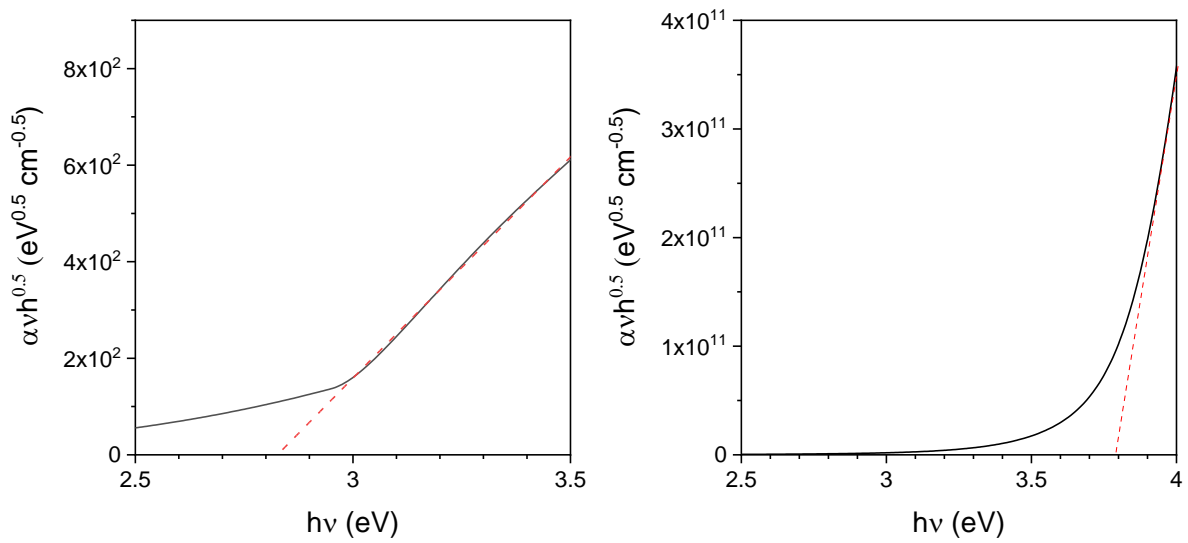

Fig S8. Tauc plots of BCN-11 (left) and BCN-12 (right)

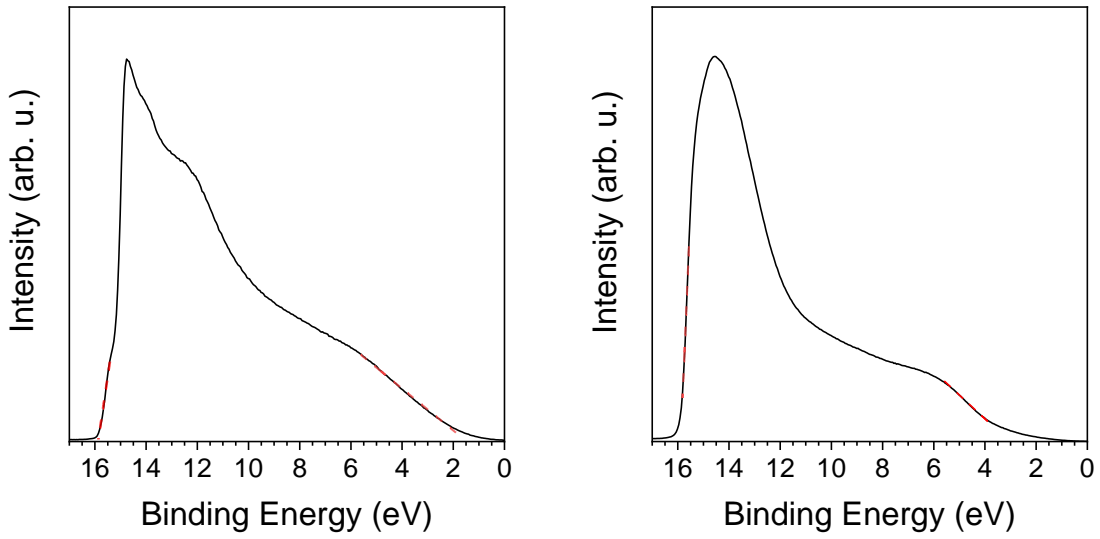

Fig S9. UPS spectra of BCN-11 (left) and BCN-12 (right).

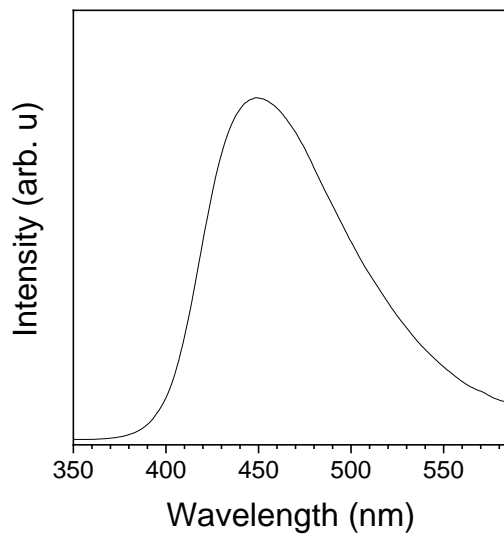

Fig S10. Fluorescence spectrum of BCN-11 thin film at 300 nm excitation.
